# Supplementary material for: Prohibitin plays a critical role in Enterovirus 71 neuropathogenesis
Source: PubMed Central journal article supplement (PMC5764453; doi:10.1371/journal.ppat.1006778), 2018-01-11

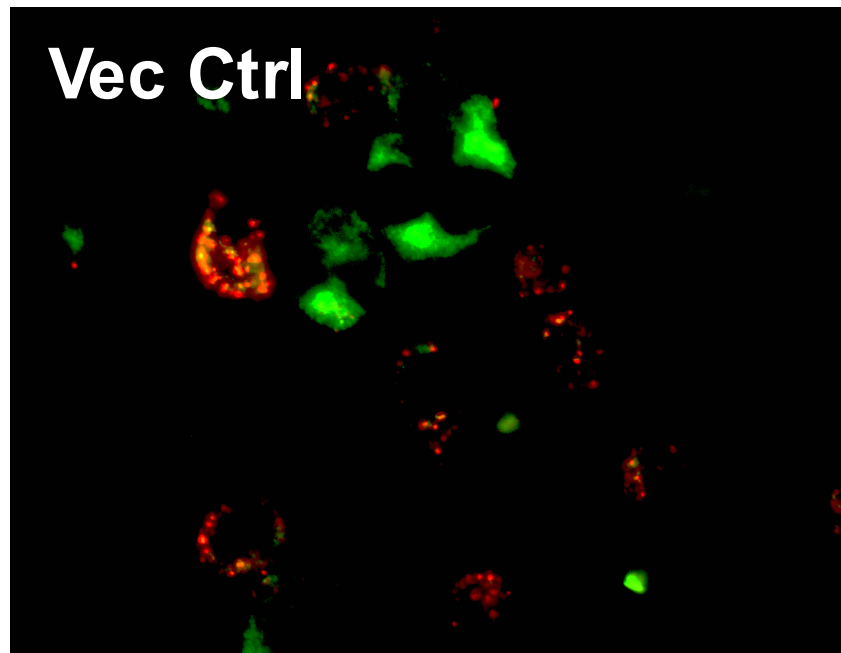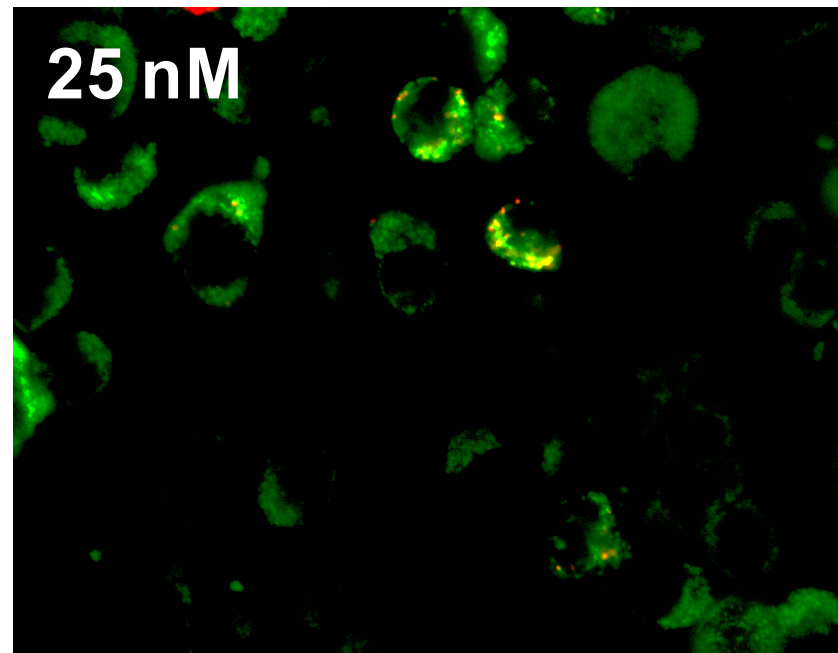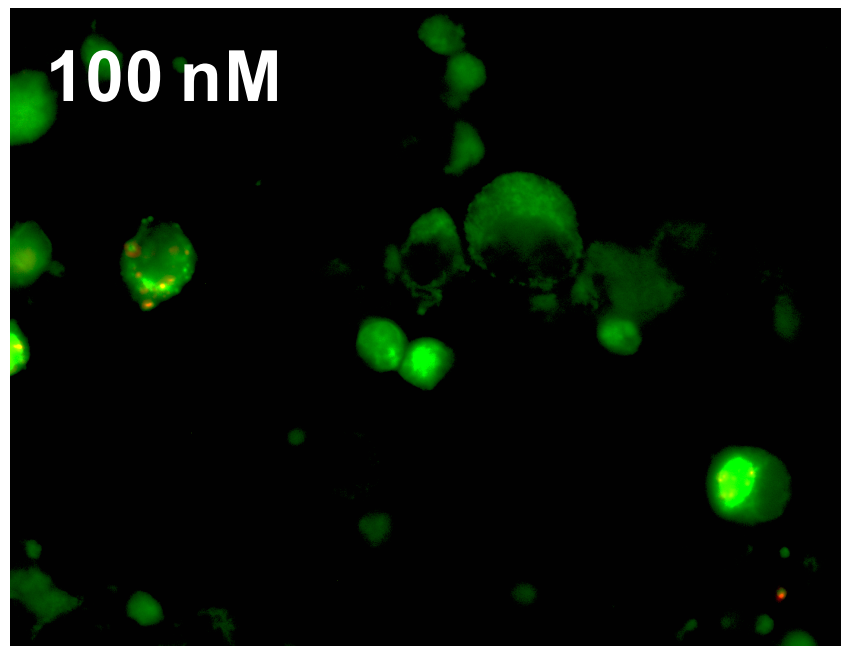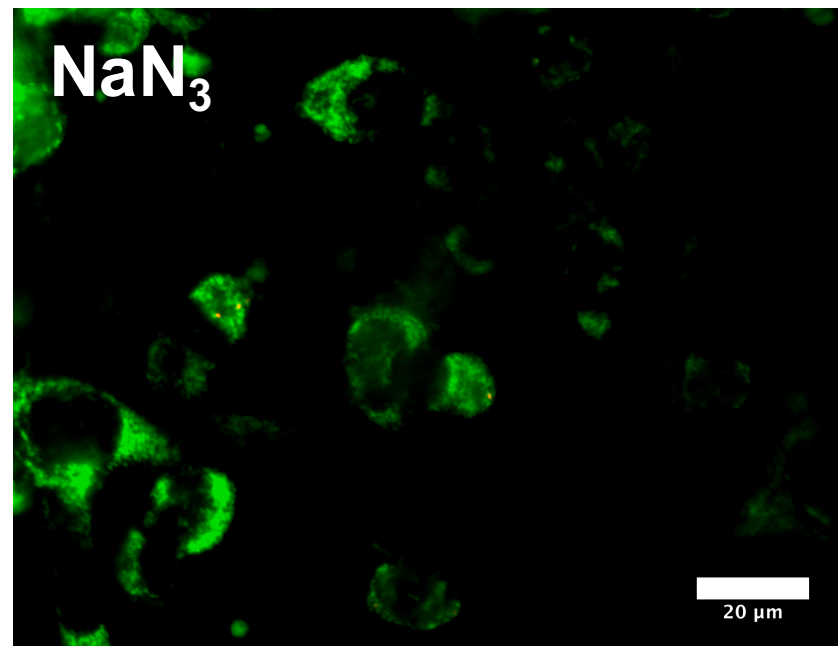

Supplement: ppat.1006778.s013.pdf [file ppat.1006778.s013.pdf]
