# Supplementary material for: Prohibitin plays a critical role in Enterovirus 71 neuropathogenesis
Source: PubMed Central journal article supplement (PMC5764453; doi:10.1371/journal.ppat.1006778), 2018-01-11
Supplement: ppat.1006778.s014.pdf [file ppat.1006778.s014.pdf]

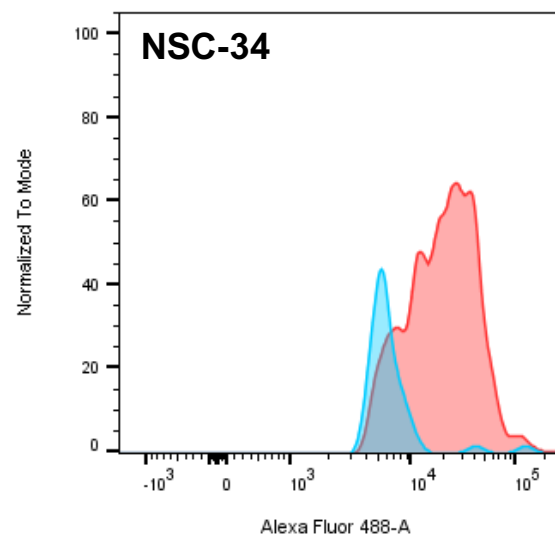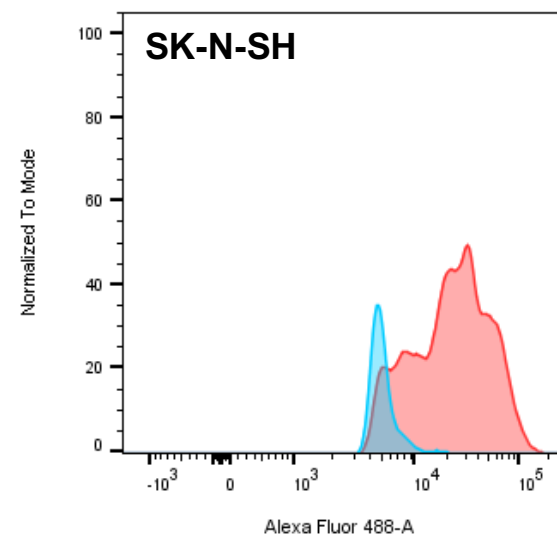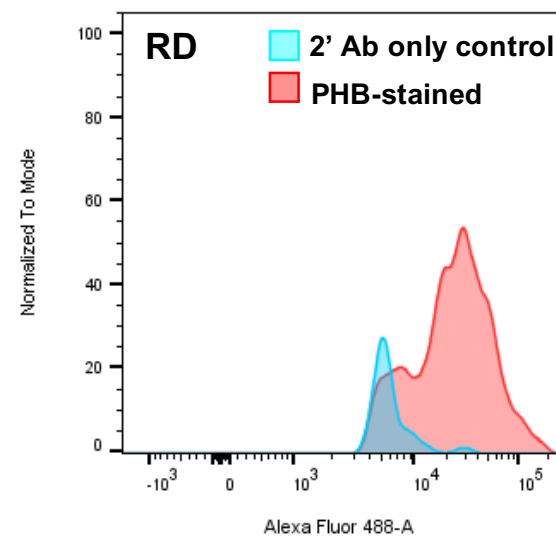

| Cell Lines | MFI   |
|------------|-------|
| NSC-34     | 25094 |
| RD         | 30859 |
| SK-N-SH    | 29211 |
